# Supplementary material
Source: HighWire-hosted journal article supplement (https://diabetes.diabetesjournals.org/content/suppl/2019/03/22/db18-1009)
Supplement: DB181009SupplementaryData.pdf [file DB181009SupplementaryData.pdf]

SUPPLEMENTARY DATA

**Supplementary Figure S1. Dose optimization of the P-NT dose** A) Body weight and B) Food intake during 6 days of treatment for vehicle, liraglutide (8 nmol/kg), P-NT (396 nmol/kg), P-NT (1188 nmol/kg), P-NT (396 nmol/kg) + liraglutide (8 nmol/kg) and P-NT (1188 nmol/kg) + liraglutide (8 nmol/kg), C) Body weight and D) Food intake during 3 days of treatment for vehicle, Liraglutide (2 nmol/kg), P-NT (44 nmol/kg), P-NT (132 nmol/kg), P-NT (396 nmol/kg), P-NT (44 nmol/kg) + liraglutide (2 nmol/kg), P-NT (132 nmol/kg) + liraglutide (2 nmol/kg) and P-NT (396 nmol/kg) + liraglutide (2 nmol/kg). Data are mean  $\pm$  SD. n=6.

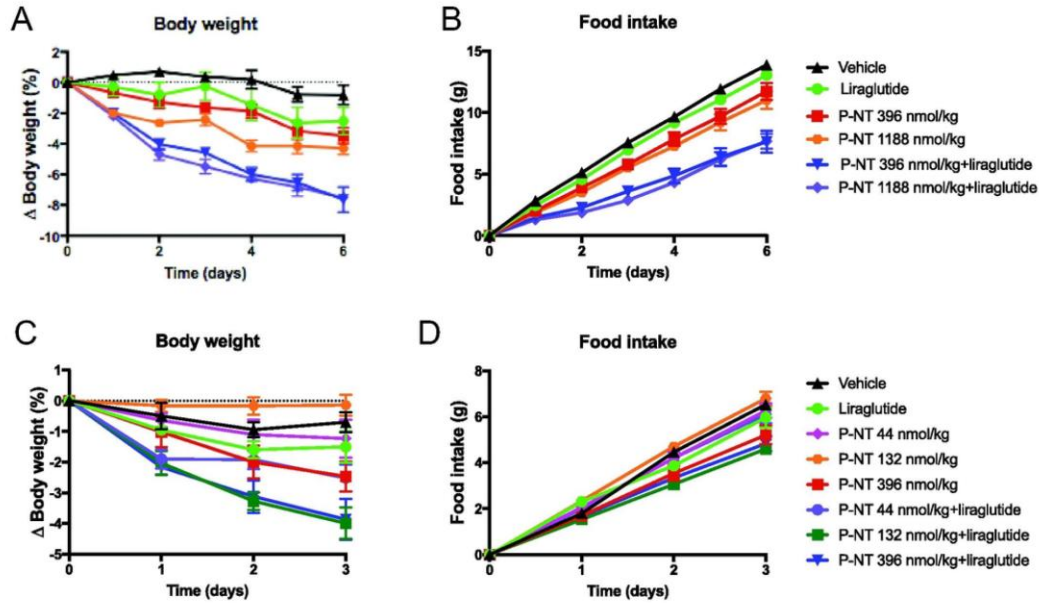

SUPPLEMENTARY DATA

**Supplementary Figure S2. Multiplex fluorescence *in situ* hybridization (M-FISH) control studies in the murine arcuate nucleus.**

A) Representative confocal images of the arcuate nucleus section stained with probes specific for the housekeeping gene (positive control) *Mus musculus* Peptidylpropyl isomerase B (Ppib) mRNA with either fluorescein (Fluor), Cyanine3 (Cy3) or Cyanine5 (Cy5) demonstrating no or negligible crosstalk between the respective channels. B) Same as above, however stained with probes specific for *Bacillus subtilis* dihydrodipicolinate reductase (DapB) mRNA as a negative control demonstrating no staining in any channels. Nuclei was visualized with DAPI counterstaining (blue). Scale bars, 20  $\mu$ m. n=3 mice.

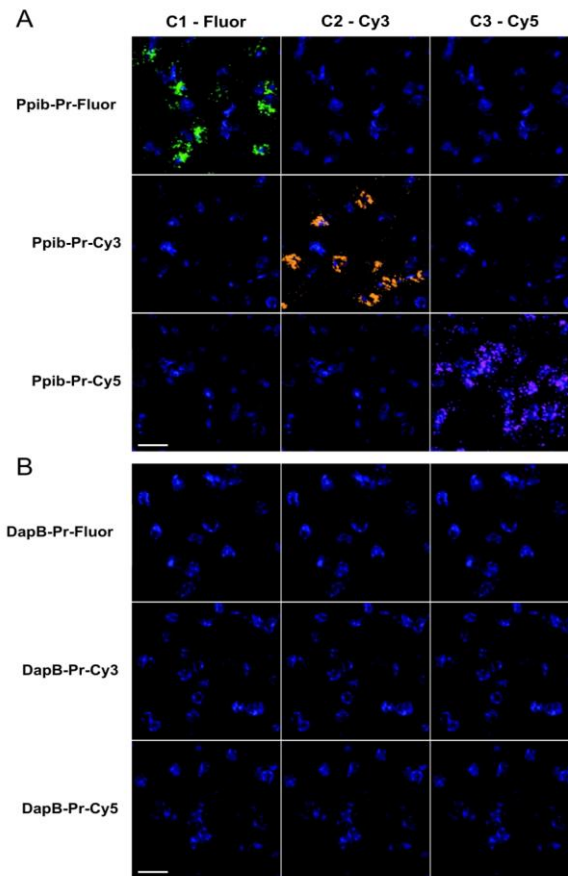

SUPPLEMENTARY DATA

**Supplementary Figure S3. Depolarization of Pomc neurons by neurotensin and liraglutide in the presence of tetrodotoxin.** A) Representative electrophysiological trace demonstrating that the NT induced depolarization of Pomc-hrGFP neurons persists in the presence of TTX, B) Representative electrophysiological trace demonstrating that the NT and liraglutide induced depolarization of Pomc-hrGFP neurons persists in the presence of TTX, C) NT and NT+liraglutide induced changes of membrane potential of POMC neurons with pretreatment of TTX. Error bars indicate SD. Data tested with Mann-Whitney non-parametric test n=4-5.

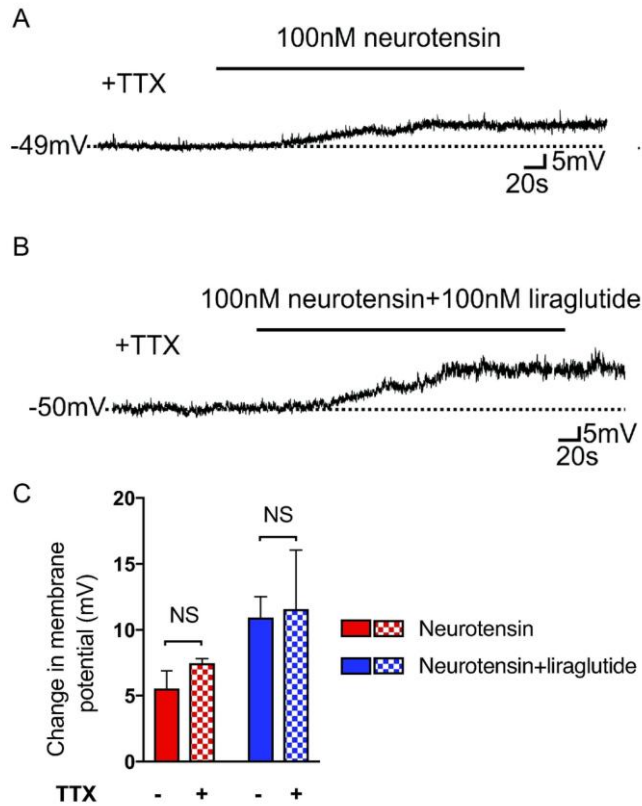

SUPPLEMENTARY DATA

**Supplementary Figure S4. Effect of high dose liraglutide mono-therapy in MC4R KO mice compared to DIO controls.** A) Body weight, B) Cumulative food intake. # $p < 0.05$ , ## $p < 0.01$ , ### $p < 0.001$ , \*\*\*\*/ $p < 0.0001$ , \*\*\*\*\*/#####/§§§§ $p < 0.0001$ . \*\*\*\* represent differences between DIO vehicle and DIO liraglutide, ###/###/##### represent differences between DIO liraglutide and MC4R KO liraglutide, §§§§ represent differences between MC4R KO vehicle and MC4R KO liraglutide. Data tested with two-way ANOVA repeated measurements with Tukey's multiple comparison test for individual time points. Data are mean  $\pm$  SD.  $n = 6$ .

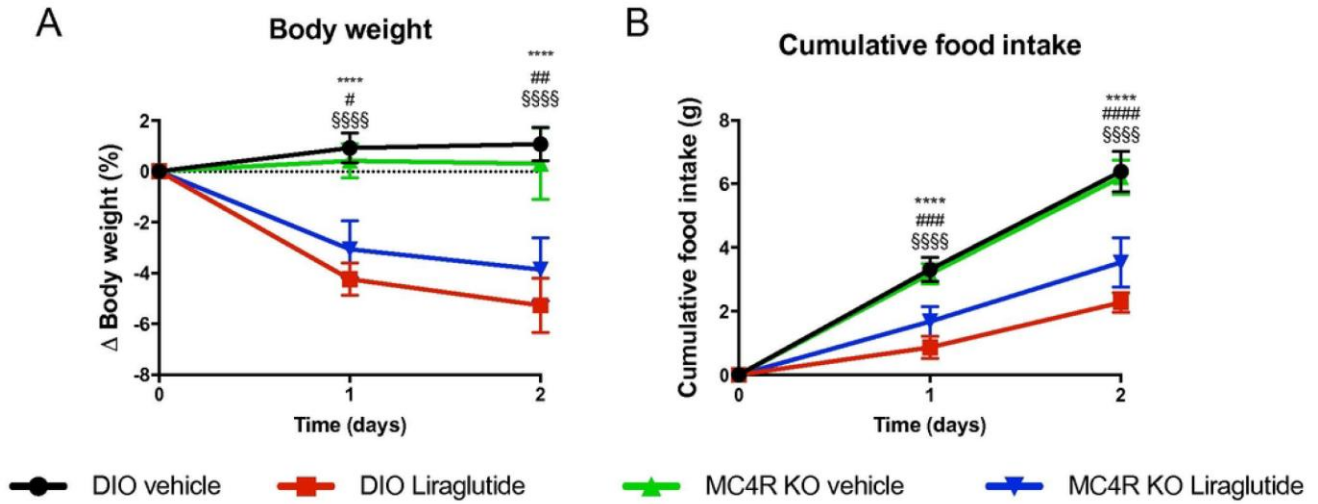

## SUPPLEMENTARY DATA

## Supplementary Table S1. Primers

| <b>Gene</b>     | <b>Forward primer</b> | <b>Reverse primer</b>    |
|-----------------|-----------------------|--------------------------|
| <i>HPRT</i>     | CTTTGCTGACCTGCTGGATT  | TTTCCAGTTAAAGTTGAGAGATCA |
| <i>TBP</i>      | TCAAACCCAGAATTGTTCTCC | GGTAGATGTTTTCAAATGCTTCA  |
| <i>LDLR</i>     | TCAGACGAACAAGGCTGTCC  | CCATCTAGGCAATCTCGGTCTC   |
| <i>LRPI</i>     | AACCTTATGAATCCACGCGC  | TTCTTGGGGCCATCATCAGT     |
| <i>PCSK9</i>    | CACCCTGGATGCTGGTATCT  | GACCTCTTCCCTGGCTTCTT     |
| <i>LIPC</i>     | ATGTGGGGTTAGTGGACTGG  | TTGTTCTTCCCGTCCATGGA     |
| <i>IDOL</i>     | AGGACTGTCTCAACCAGGTG  | TGCCTTGTCTGCTCCTGTAA     |
| <i>SORT1</i>    | ATCCCAGGAGACAAATGCCA  | AACCTTCCGCCACAGACATA     |
| <i>Cyp7b1</i>   | TCTGGGCCTCTCTAGCAAAC  | GCACTTCTCGGATGATGCTG     |
| <i>Cyp8b1</i>   | CAGCGGACAAGAGTACCAGA  | TGGATCTTCTTGCCCGACTT     |
| <i>Cyp27A11</i> | CTTCATCGCACAAGGAGAGC  | CCAAGGCAAGGTGGTAGAGA     |
| <i>Cyp3A11</i>  | CTCTCACTGGAAACCTGGGT  | TCTGTGACAGCAAGGAGAGG     |
| <i>SQLE</i>     | TGTTGCGGATGGACTCTTCT  | GAGAACTGGACTGGGGTTGA     |
| <i>APOE</i>     | GATCAGCTCGAGTGGCAAAG  | TAGTGTCTCCATCAGTGCC      |
| <i>ABCA1</i>    | AAAACCGCAGACATCCTTCAG | CATACCGAAACTCGTTCACCC    |
